# Supplementary material
Source: PubMed Central journal article supplement (PMC8423769)
Supplement: mmc1.pdf [file mmc1.pdf]

## Rationing With Respect to Age During a Pandemic

### A Comparative Analysis of State Pandemic Preparedness Plans

*Emily Scire, MD, MBE; Kyeong Yun Jeong, MD; MaryKatherine Gaurke, BA; Bernard Prusak, PhD; and Daniel P. Sulmasy, MD, PhD*

CHEST 2022; 161(2):504-513

*Online supplements are not copyedited prior to posting and the author(s) take full responsibility for the accuracy of all data.*

© 2022 AMERICAN COLLEGE OF CHEST PHYSICIANS. Reproduction of this article is prohibited without written permission from the American College of Chest Physicians. See online for more details. DOI: 10.1016/j.chest.2021.08.070

**e-Table 1:** Summary of State PPPs, along with Categorization

| State (Year of Official PPP Publication/Last Update)                                                                                                                                                                                                                                                                                    | Triage Scheme/ Principles Cited                                                                                                                                                                                                                                                                            | Category                         | Notes                                                                                                                                                                                                                                                                                                                              |
|-----------------------------------------------------------------------------------------------------------------------------------------------------------------------------------------------------------------------------------------------------------------------------------------------------------------------------------------|------------------------------------------------------------------------------------------------------------------------------------------------------------------------------------------------------------------------------------------------------------------------------------------------------------|----------------------------------|------------------------------------------------------------------------------------------------------------------------------------------------------------------------------------------------------------------------------------------------------------------------------------------------------------------------------------|
| Alabama (2020)<br><a href="https://www.adph.org/CEPSecure/assets/alabamacscguidelines2020.pdf">https://www.adph.org/CEPSecure/assets/alabamacscguidelines2020.pdf</a>                                                                                                                                                                   | A general mass casualty triage guideline focused on saving the most lives; rejects age as a consideration                                                                                                                                                                                                  | <b>A-Short-term Survival</b>     |                                                                                                                                                                                                                                                                                                                                    |
| Alaska (2020)<br><a href="http://dhss.alaska.gov/dph/Epi/id/SiteAssets/Pages/HumanCoV/SOA_DHSS_CrisisStandardsOfCare.pdf">http://dhss.alaska.gov/dph/Epi/id/SiteAssets/Pages/HumanCoV/SOA_DHSS_CrisisStandardsOfCare.pdf</a>                                                                                                            | Considers SOFA, duration of benefit/longer-term prognosis (beyond 1-2 years), duration of need, response to mechanical ventilation                                                                                                                                                                         | <b>B-1-5 Expected Life-years</b> | Identical to MN CSC                                                                                                                                                                                                                                                                                                                |
| Arizona (2020)<br><a href="https://azdhs.gov/documents/preparedness/epidemiology-disease-control/infectious-disease-epidemiology/novel-coronavirus/sdmac/covid-19-addendum.pdf">https://azdhs.gov/documents/preparedness/epidemiology-disease-control/infectious-disease-epidemiology/novel-coronavirus/sdmac/covid-19-addendum.pdf</a> | Uses SOFA as in previous versions, and also adds consideration of 1-5 year survival in calculating a priority score. In case of ties, providers may consider prioritizing pediatric patients, healthcare workers, single caretakers, pregnant patients, and those who have lived through fewer life stages | <b>C-Total Life-years</b>        | Cites Pittsburgh Model<br><br>Of note, AZ is the only state to enact its plan to date<br><a href="https://www.azmirror.com/2020/07/03/as-covid-19-worsens-az-is-the-first-state-to-enact-crisis-care-standards/">https://www.azmirror.com/2020/07/03/as-covid-19-worsens-az-is-the-first-state-to-enact-crisis-care-standards/</a> |
| Arkansas (None)                                                                                                                                                                                                                                                                                                                         |                                                                                                                                                                                                                                                                                                            |                                  | 2014 Pandemic Influenza Plan with no triage guidelines<br><a href="https://www.arcourts.gov/sites/default/files/articles/ADH-Pandemic-Flu-Response-Plan.pdf">https://www.arcourts.gov/sites/default/files/articles/ADH-Pandemic-Flu-Response-Plan.pdf</a><br>UAMS also apparently has a                                            |



|                                                                                                                                                                                                                                                                                                                                                      |                                                                                                                                                                                                                                                   |                                                     |                                                                                                                                                                                                                                                   |
|------------------------------------------------------------------------------------------------------------------------------------------------------------------------------------------------------------------------------------------------------------------------------------------------------------------------------------------------------|---------------------------------------------------------------------------------------------------------------------------------------------------------------------------------------------------------------------------------------------------|-----------------------------------------------------|---------------------------------------------------------------------------------------------------------------------------------------------------------------------------------------------------------------------------------------------------|
|                                                                                                                                                                                                                                                                                                                                                      |                                                                                                                                                                                                                                                   |                                                     | plan which has not been endorsed by the AR DOH<br><a href="https://www.arkansasonline.com/news/2020/may/18/creation-of-care-policies-gets-look-202/">https://www.arkansasonline.com/news/2020/may/18/creation-of-care-policies-gets-look-202/</a> |
| California (2020)<br><a href="https://www.cdph.ca.gov/Programs/CID/DCDC/CDPH%20Document%20Library/COVID-19/California%20SARS-CoV-2%20Crisis%20Care%20Guidelines%20-June%208%202020.pdf">https://www.cdph.ca.gov/Programs/CID/DCDC/CDPH%20Document%20Library/COVID-19/California%20SARS-CoV-2%20Crisis%20Care%20Guidelines%20-June%208%202020.pdf</a> | Uses SOFA; for ties can consider comorbidities that affect near-term survival ( $\leq 6$ mo.)                                                                                                                                                     | <b>A-Short-term Survival</b>                        |                                                                                                                                                                                                                                                   |
| Colorado (2020)<br><a href="https://drive.google.com/file/d/1IIIEDTwEP6HQxzy5Az-9maYJxO7R6bp/view">https://drive.google.com/file/d/1IIIEDTwEP6HQxzy5Az-9maYJxO7R6bp/view</a>                                                                                                                                                                         | Tier 1: short-term survival (SOFA/mCCI)<br>Tier 2: children (life-cycles) and health care workers<br>Tier 3: Pregnant/a caregiver, or maximizing life-years saved (near to intermediate term 1-5 years out)<br>Tier 4: Random allocation for ties | <b>C-Total Life-years (secondary consideration)</b> | Cites Pittsburgh Model and 2018 version of CO plan                                                                                                                                                                                                |
| Connecticut (2010)<br><a href="https://portal.ct.gov/-/media/Departments-and-Agencies/DPH/dph/legal/StandardsofCarefinalpdf.pdf">https://portal.ct.gov/-/media/Departments-and-Agencies/DPH/dph/legal/StandardsofCarefinalpdf.pdf</a>                                                                                                                | Cites plans like 2010 MN, CA, etc. and suggests using a standardized scoring system like SOFA                                                                                                                                                     | <b>O-Other</b>                                      |                                                                                                                                                                                                                                                   |
| Delaware (2020)<br><a href="https://www.centerforpublicrep.org/wp-content/uploads/2020/05/DE-CSC-ConOps-FInal-4-29-20.pdf">https://www.centerforpublicrep.org/wp-content/uploads/2020/05/DE-CSC-ConOps-FInal-4-29-20.pdf</a>                                                                                                                         | Focus is saving the most lives; uses SOFA and does not consider prognosis beyond acute illness; ignores age (if not relevant for                                                                                                                  | <b>A-Short-term Survival</b>                        |                                                                                                                                                                                                                                                   |



|                | current survival) and stable chronic conditions |  |                                                                                                                                                                                                                                                                                                                                                                                                                                                                                                                                                                                                                                             |
|----------------|-------------------------------------------------|--|---------------------------------------------------------------------------------------------------------------------------------------------------------------------------------------------------------------------------------------------------------------------------------------------------------------------------------------------------------------------------------------------------------------------------------------------------------------------------------------------------------------------------------------------------------------------------------------------------------------------------------------------|
| Florida (None) |                                                 |  | 2020 FL Bioethics Network Plan: Considers short-term (save lives) and longer-term (save life-years) by factoring in SOFA and comorbidities; Age bracket/life-cycle considerations and health care worker status can be used as tie-breakers <a href="http://www.fha.org/news/show-details/Florida-Hospital-Association-Supports-Ethics-Guidelines-for-Crisis-Standards-of-Care-in-Public-Health-Emergencies-from-Florida-Bioethics-Network/56">http://www.fha.org/news/show-details/Florida-Hospital-Association-Supports-Ethics-Guidelines-for-Crisis-Standards-of-Care-in-Public-Health-Emergencies-from-Florida-Bioethics-Network/56</a> |
| Georgia (None) |                                                 |  | 2009 Pandemic Influenza Plan with no triage guidelines <a href="https://dch.georgia.gov/documents/pandemic-influenza-business-continuity-plan">https://dch.georgia.gov/documents/pandemic-influenza-business-continuity-plan</a>                                                                                                                                                                                                                                                                                                                                                                                                            |
| Hawaii (None)  |                                                 |  | 2020 draft guidelines in approval process exclude people with severe illness likely to die in short-term, then considers SOFA score and longer-term survival (10 years out); penalizes those >65 with COVID-19, and uses                                                                                                                                                                                                                                                                                                                                                                                                                    |



|                                                                                                                                                                                                                                  |                                                                                                                                                                                                                                                                                                                                                                                                                                                                                          |                                  |                                                                                                                                                                                                                                                                                         |
|----------------------------------------------------------------------------------------------------------------------------------------------------------------------------------------------------------------------------------|------------------------------------------------------------------------------------------------------------------------------------------------------------------------------------------------------------------------------------------------------------------------------------------------------------------------------------------------------------------------------------------------------------------------------------------------------------------------------------------|----------------------------------|-----------------------------------------------------------------------------------------------------------------------------------------------------------------------------------------------------------------------------------------------------------------------------------------|
|                                                                                                                                                                                                                                  |                                                                                                                                                                                                                                                                                                                                                                                                                                                                                          |                                  | age/ life-cycles tie-breaker<br><a href="https://georgetown.box.com/s/mqswltos_u1fnk2zxvor3q10aae1ihuqt">https://georgetown.box.com/s/mqswltos_u1fnk2zxvor3q10aae1ihuqt</a>                                                                                                             |
| Idaho (None)                                                                                                                                                                                                                     |                                                                                                                                                                                                                                                                                                                                                                                                                                                                                          |                                  | Apparently there were 2020 guidelines in development, but we did not hear back from them; 2017 EOP is non-specific<br><a href="https://ioem.idaho.gov/wp-content/uploads/sites/57/2018/12/2017-IDEOP.pdf">https://ioem.idaho.gov/wp-content/uploads/sites/57/2018/12/2017-IDEOP.pdf</a> |
| Illinois (2020)<br><a href="https://www.dph.illinois.gov/sites/default/files/Guidelines%20on%20Emergency%20Preparedness.pdf">https://www.dph.illinois.gov/sites/default/files/Guidelines%20on%20Emergency%20Preparedness.pdf</a> | Provides generally guiding ethical principles for hospitals, and suggests potential criteria for de-prioritization of patients who are unlikely to benefit from a scarce resource or treatment, such as (1) risk of mortality or morbidity for a particular patient; (2) likelihood of good or acceptable response to a treatment or resource for a particular patient; and (3) community risk of transmitting infection and ability to reduce that risk by using a particular resource. | <b>O-Other</b>                   | 2018 EOP also addresses triage generally<br><a href="https://dph.illinois.gov/sites/default/files/publications/catastrrophic-incident-response-annex-052218.pdf">https://dph.illinois.gov/sites/default/files/publications/catastrrophic-incident-response-annex-052218.pdf</a>         |
| Indiana (2014)<br><a href="https://emeraldcoasthcc.org/sites/emeraldcoasthcc.site/files/indiana-crisis-standards-">https://emeraldcoasthcc.org/sites/emeraldcoasthcc.site/files/indiana-crisis-standards-</a>                    | Exclusion criteria (NYHA Class III Heart Failure (HF), dialysis-dependent, etc.); SOFA score; then first                                                                                                                                                                                                                                                                                                                                                                                 | <b>B-1-5 Expected Life-years</b> |                                                                                                                                                                                                                                                                                         |



|                                                                                                                                                                                                                                                                                                                                               |                                                                                                                                                                        |                                  |                                                                                                                                                                                                                                                                                            |
|-----------------------------------------------------------------------------------------------------------------------------------------------------------------------------------------------------------------------------------------------------------------------------------------------------------------------------------------------|------------------------------------------------------------------------------------------------------------------------------------------------------------------------|----------------------------------|--------------------------------------------------------------------------------------------------------------------------------------------------------------------------------------------------------------------------------------------------------------------------------------------|
| <a href="#">of-care-2014.pdf</a>                                                                                                                                                                                                                                                                                                              | come, first serve as tie-breaker                                                                                                                                       |                                  |                                                                                                                                                                                                                                                                                            |
| Iowa (2007)<br><a href="http://publications.iowa.gov/17889/1/panflu_ethical_guidelines_manual.pdf">http://publications.iowa.gov/17889/1/panflu_ethical_guidelines_manual.pdf</a>                                                                                                                                                              | Considers SOFA score and notes one may need to choose young and healthy over older and sicker who have <i>less chance of surviving</i> ; prioritizes essential workers | <b>A-Short-term Survival</b>     | 2020 Draft is awaiting final review/approval per in-state contact                                                                                                                                                                                                                          |
| Kansas (2013)<br><a href="https://www.kdheks.gov/cphp/download/Crisis_Protocols.pdf">https://www.kdheks.gov/cphp/download/Crisis_Protocols.pdf</a>                                                                                                                                                                                            | Exclusion criteria (NYHA Class III HF, etc.); then uses SOFA; random allocation or first-come-first-served for ties                                                    | <b>B-1-5 Expected Life-years</b> | 2020 Pandemic Influenza Plan reaffirmed 2013 CSC<br><a href="https://www.kdheks.gov/cphp/download/KS_PF_Plan.pdf">https://www.kdheks.gov/cphp/download/KS_PF_Plan.pdf</a>                                                                                                                  |
| Kentucky (2020)<br><a href="https://www.kyha.com/assets/docs/COVID19/Update/CrisisStandardsOfCareFinal.pdf">https://www.kyha.com/assets/docs/COVID19/Update/CrisisStandardsOfCareFinal.pdf</a>                                                                                                                                                | Considers SOFA, comorbidities that reduce 1 year survival, and expected resource utilization; offers example exclusion criteria including age > 85                     | <b>D-Fair Innings</b>            | CSC suggest decision on exclusion criteria could be made locally                                                                                                                                                                                                                           |
| Louisiana (2019)<br><a href="https://bloximages.nyork1.vip.townnews.com/nola.com/content/tncms/assets/v3/editorial/3/03/30339376-84a4-11ea-a8d4-0f02d2e4e840/5ea0528be9f00.pdf.pdf">https://bloximages.nyork1.vip.townnews.com/nola.com/content/tncms/assets/v3/editorial/3/03/30339376-84a4-11ea-a8d4-0f02d2e4e840/5ea0528be9f00.pdf.pdf</a> | Exclusion criteria include persistent (>72 hour) coma and GCS < 6; then triage based on SOFA                                                                           | <b>A-Short-term Survival</b>     | Offers fair innings and life-cycles as ethical considerations in background section but does not truly apply                                                                                                                                                                               |
| Maine (None)                                                                                                                                                                                                                                                                                                                                  |                                                                                                                                                                        |                                  | 2015 EOP only provides general guidance; we did not hear back about other plans<br><a href="https://www.maine.gov/dhhs/mecdc/public-health-systems/phep/documents/mainecdcallha_zeop.pdf">https://www.maine.gov/dhhs/mecdc/public-health-systems/phep/documents/mainecdcallha_zeop.pdf</a> |



|                                                                                                                                                                                                                                                                                                                                                                      |                                                                                                                                                                                                                                                      |                                                            |                                                                                                                                                                                                                                                                                                                                                                                                                                                                                                                                                                                                                                          |
|----------------------------------------------------------------------------------------------------------------------------------------------------------------------------------------------------------------------------------------------------------------------------------------------------------------------------------------------------------------------|------------------------------------------------------------------------------------------------------------------------------------------------------------------------------------------------------------------------------------------------------|------------------------------------------------------------|------------------------------------------------------------------------------------------------------------------------------------------------------------------------------------------------------------------------------------------------------------------------------------------------------------------------------------------------------------------------------------------------------------------------------------------------------------------------------------------------------------------------------------------------------------------------------------------------------------------------------------------|
| <p>Maryland (None)</p>                                                                                                                                                                                                                                                                                                                                               |                                                                                                                                                                                                                                                      |                                                            | <p>2020 draft unapproved: Mentions saving lives and life-years; uses exclusion criteria, SOFA and "long-term survival" (&lt; 1 year prognosis); life-cycle considerations, followed by random chance<br/> <a href="https://journal.chestnet.org/article/S0012-3692(18)32565-0/fulltext">https://journal.chestnet.org/article/S0012-3692(18)32565-0/fulltext</a><br/><br/>         Attorney General has approved the concept of a CSC in the state<br/> <a href="https://www.marylandattorneygeneral.gov/Opinions%20Documents/2015/100oag160.pdf">https://www.marylandattorneygeneral.gov/Opinions%20Documents/2015/100oag160.pdf</a></p> |
| <p>Massachusetts (2020)<br/> <a href="https://georgetown.brookings.edu/wp-content/uploads/2020/04/2020-04-16-Georgetown-Brookings-Paper-Proposed-CSC-Model-for-ICU-Admission-Decision-Making.pdf">https://georgetown.brookings.edu/wp-content/uploads/2020/04/2020-04-16-Georgetown-Brookings-Paper-Proposed-CSC-Model-for-ICU-Admission-Decision-Making.pdf</a></p> | <p>Goal of saving most lives (SOFA) and life-years (considers comorbidities with impact on "near-term" survival, 1-5 years from admission); life-cycle considerations and pregnant/essential worker status for tie-breakers, followed by lottery</p> | <p><b>C-Total Life-years</b></p>                           | <p>Based on Pittsburgh Model</p>                                                                                                                                                                                                                                                                                                                                                                                                                                                                                                                                                                                                         |
| <p>Michigan (2012)<br/> <a href="http://www.mimedicalethics.org/Documentation/Michigan%20DCH%20Ethical%20Scarce%20Resources%20Guidelines%20v2%20rev%20Nov%202012.0.pdf">http://www.mimedicalethics.org/Documentation/Michigan%20DCH%20Ethical%20Scarce%20Resources%20Guidelines%20v2%20rev%20Nov%202012.0.pdf</a></p>                                                | <p>Creates tiers of priority based on medical prognosis ("survivability and favorable outcomes") and essential social function (health workers); secondarily, suggests age/QALY/DALYs</p>                                                            | <p><b>C-Total Life-years (secondary consideration)</b></p> |                                                                                                                                                                                                                                                                                                                                                                                                                                                                                                                                                                                                                                          |



|                                                                                                                                                                                                                                                                                                         |                                                                                                                                                                                                                                                                                                                   |                                  |                                                                    |
|---------------------------------------------------------------------------------------------------------------------------------------------------------------------------------------------------------------------------------------------------------------------------------------------------------|-------------------------------------------------------------------------------------------------------------------------------------------------------------------------------------------------------------------------------------------------------------------------------------------------------------------|----------------------------------|--------------------------------------------------------------------|
|                                                                                                                                                                                                                                                                                                         | (based on fair innings principle), lottery, or first-come-first-served would be acceptable                                                                                                                                                                                                                        |                                  |                                                                    |
| Minnesota (2020)<br><a href="https://www.health.state.mn.us/communities/ep/surge/crisis/standards.pdf">https://www.health.state.mn.us/communities/ep/surge/crisis/standards.pdf</a>                                                                                                                     | SOFA (short-term <6mo. prognosis), duration of benefit/longer-term prognosis (1-2 years out), duration of need, response to mechanical ventilation                                                                                                                                                                | <b>B-1-5 Expected Life-years</b> |                                                                    |
| Mississippi (2017)<br><a href="https://msdh.ms.gov/msdhsite/static/resources/7221.pdf">https://msdh.ms.gov/msdhsite/static/resources/7221.pdf</a>                                                                                                                                                       | Provides a general ethical framework                                                                                                                                                                                                                                                                              | <b>O-Other</b>                   |                                                                    |
| Missouri (2020)<br><a href="https://www.mhanet.com/mhaimages/COVID-19/A%20Framework%20for%20Managing%20the%202020%20COVID.pdf">https://www.mhanet.com/mhaimages/COVID-19/A%20Framework%20for%20Managing%20the%202020%20COVID.pdf</a>                                                                    | Recommends multiple established frameworks, leaving decision up to hospitals, but highlights Pittsburgh Model: SOFA, life-years considerations (comorbidities that affect "near term" 5 year survival), life-cycles tie-breaker using age brackets, then lottery                                                  | <b>C-Total Life-years</b>        | Pittsburgh Model is used as the primary example framework endorsed |
| Montana (2020)<br><a href="https://georgetown.brookings.edu/wp-content/uploads/2020/04/2020-04-20-Georgetown-Brookings-Report-on-Montana-COVID-19-Response.pdf">https://georgetown.brookings.edu/wp-content/uploads/2020/04/2020-04-20-Georgetown-Brookings-Report-on-Montana-COVID-19-Response.pdf</a> | Mentions "life-years saved" as one priority to balance. Excludes those unlikely to survive acute admission; then considers SOFA (short-term) and longer-term survival based on comorbidities (looking at least 10 years out, based on examples of major comorbidities given); tie-breakers include: children over | <b>C-Total Life-years</b>        | Influenced by WA, MD, MN, VAH, and Pittsburgh guidelines           |





|                                                                                                                                                                                                                                                                      |                                                                                                                                                                             |                           |                                                                                                                                                                                                                                                                                                                                                                 |
|----------------------------------------------------------------------------------------------------------------------------------------------------------------------------------------------------------------------------------------------------------------------|-----------------------------------------------------------------------------------------------------------------------------------------------------------------------------|---------------------------|-----------------------------------------------------------------------------------------------------------------------------------------------------------------------------------------------------------------------------------------------------------------------------------------------------------------------------------------------------------------|
|                                                                                                                                                                                                                                                                      | adults (vulnerable population), raw SOFA score, life-cycle considerations (if age gap > 30 years), prioritizing those already receiving care, and finally random allocation |                           |                                                                                                                                                                                                                                                                                                                                                                 |
| Nebraska (None)                                                                                                                                                                                                                                                      |                                                                                                                                                                             |                           | Only 2020 EOP found, no triage guidelines; we did not hear back about other plans<br><a href="https://nema.nebraska.gov/sites/nema.nebraska.gov/files/doc/standard-leop.pdf">https://nema.nebraska.gov/sites/nema.nebraska.gov/files/doc/standard-leop.pdf</a>                                                                                                  |
| Nevada (2020)<br><a href="https://nvhealthresponse.nv.gov/wp-content/uploads/2020/04/NV_DHHS_DPBH_CSCRecommendations_COVID-19_040220_ADA.pdf">https://nvhealthresponse.nv.gov/wp-content/uploads/2020/04/NV_DHHS_DPBH_CSCRecommendations_COVID-19_040220_ADA.pdf</a> | Provides Code of Ethics, including prioritizing those most likely to medically benefit (and possibly healthcare workers); remains general                                   | <b>O-Other</b>            |                                                                                                                                                                                                                                                                                                                                                                 |
| New Hampshire (None)                                                                                                                                                                                                                                                 |                                                                                                                                                                             |                           | June 2020 Draft is posted online: Goal of saving the most lives, based on SOFA and comorbidities affecting near-term survival (<1 year out); as tie-breakers, children and pregnant women get priority, then random allocation can be used<br><a href="https://www.dhhs.nh.gov/documents/nh-csc-plan.pdf">https://www.dhhs.nh.gov/documents/nh-csc-plan.pdf</a> |
| New Jersey (2020)<br><a href="https://nj.gov/health/legal/covid19/FinalAllo">https://nj.gov/health/legal/covid19/FinalAllo</a>                                                                                                                                       | Focus on saving lives and life-years based on SOFA (short-term)                                                                                                             | <b>C-Total Life-years</b> | Based on Pittsburgh Model                                                                                                                                                                                                                                                                                                                                       |



|                                                                                                                                                                                                                                                                                                                                                                                    |                                                                                                                                                                                                                                                                          |                                                     |                                                                                                                                                                                                                                                                                                                                                                               |
|------------------------------------------------------------------------------------------------------------------------------------------------------------------------------------------------------------------------------------------------------------------------------------------------------------------------------------------------------------------------------------|--------------------------------------------------------------------------------------------------------------------------------------------------------------------------------------------------------------------------------------------------------------------------|-----------------------------------------------------|-------------------------------------------------------------------------------------------------------------------------------------------------------------------------------------------------------------------------------------------------------------------------------------------------------------------------------------------------------------------------------|
| <a href="#">cationPolicy4.11.20v2%20.pdf</a>                                                                                                                                                                                                                                                                                                                                       | and longer-term (5 year) prognosis; life-cycles tie-breaker                                                                                                                                                                                                              |                                                     |                                                                                                                                                                                                                                                                                                                                                                               |
| New Mexico (2018)<br><a href="https://www.nmhealth.org/publication/view/plan/4877">https://www.nmhealth.org/publication/view/plan/4877</a>                                                                                                                                                                                                                                         | Strictly SOFA-based triage system                                                                                                                                                                                                                                        | <b>A-Short-term Survival</b>                        | 2018 CSC was reaffirmed in 2020 Emergency Operations Plan<br><a href="https://www.nmhealth.org/publication/view/plan/5906/">https://www.nmhealth.org/publication/view/plan/5906/</a>                                                                                                                                                                                          |
| New York (2015)<br><a href="https://www.health.ny.gov/regulations/task_force/reports_publications/docs/ventilator_guidelines.pdf">https://www.health.ny.gov/regulations/task_force/reports_publications/docs/ventilator_guidelines.pdf</a>                                                                                                                                         | Rejects life-years approach; limited exclusion criteria to reflect "immediate or near-immediate mortality" despite therapy; triage based on SOFA; endorses reallocation based on clinical status; uses "fair innings" to prioritize younger age/children in case of ties | <b>C-Total Life-years (secondary consideration)</b> | These are "Ventilator Allocation Guidelines."<br><br>In 2020 New York City also created their own set of guidelines, which allow age to be used as a tie-breaker criterion<br><a href="https://www1.nyc.gov/assets/doh/downloads/pdf/imm/covid-19-patient-surge-crisis-care.pdf">https://www1.nyc.gov/assets/doh/downloads/pdf/imm/covid-19-patient-surge-crisis-care.pdf</a> |
| North Carolina (2020)<br><a href="https://www.ncha.org/wp-content/uploads/2020/04/North-Carolina-Protocol-for-Allocating-Scarce-Inpatient-Critical-Care-Resources-in-a-Pandemic_FINAL-4-6-2020541-1.pdf">https://www.ncha.org/wp-content/uploads/2020/04/North-Carolina-Protocol-for-Allocating-Scarce-Inpatient-Critical-Care-Resources-in-a-Pandemic_FINAL-4-6-2020541-1.pdf</a> | Considers SOFA, longer-term comorbidities (at least 10 years out) to save lives and life-years; uses life-cycles considerations as tie-breaker                                                                                                                           | <b>C-Total Life-years</b>                           | Based on Pittsburgh Model                                                                                                                                                                                                                                                                                                                                                     |
| North Dakota (None)                                                                                                                                                                                                                                                                                                                                                                |                                                                                                                                                                                                                                                                          |                                                     | 2020 Pandemic Influenza Plan with no triage guidelines<br><a href="https://www.health.nd.gov/media/2439/pandemic-influenza-plan-3-31-2020_redacted.pdf">https://www.health.nd.gov/media/2439/pandemic-influenza-plan-3-31-2020_redacted.pdf</a>                                                                                                                               |





|                                                                                                                                                                                                                                                                                   |                                                                                                                                                          |                              |                                                                                                                                                                                                                                                                                                                                                                                                                                                                                                                                                                                                                                                                                                                                                         |
|-----------------------------------------------------------------------------------------------------------------------------------------------------------------------------------------------------------------------------------------------------------------------------------|----------------------------------------------------------------------------------------------------------------------------------------------------------|------------------------------|---------------------------------------------------------------------------------------------------------------------------------------------------------------------------------------------------------------------------------------------------------------------------------------------------------------------------------------------------------------------------------------------------------------------------------------------------------------------------------------------------------------------------------------------------------------------------------------------------------------------------------------------------------------------------------------------------------------------------------------------------------|
| <a href="#">publications/guidelines/crisis-standards-of-care.pdf</a>                                                                                                                                                                                                              | includes organ failure (e.g. NYHA Class III HF) and terminal illnesses                                                                                   |                              |                                                                                                                                                                                                                                                                                                                                                                                                                                                                                                                                                                                                                                                                                                                                                         |
| South Carolina (None)                                                                                                                                                                                                                                                             |                                                                                                                                                          |                              | 2020 EOP does not discuss triage<br><a href="https://www.scemd.org/media/1214/19-annex-08-health-and-medical-services.pdf">https://www.scemd.org/media/1214/19-annex-08-health-and-medical-services.pdf</a><br>SC Medical Association has worked on 2020 guidelines, but they are not state-endorsed<br><a href="https://www.scmecial.org/covid-19-resources/">https://www.scmecial.org/covid-19-resources/</a><br>see also,<br><a href="https://www.greenvilleonline.com/story/news/health/2020/04/20/coronavirus-south-carolina-task-force-ethical-issues-overwhelmed-hospitals/5151600002/">https://www.greenvilleonline.com/story/news/health/2020/04/20/coronavirus-south-carolina-task-force-ethical-issues-overwhelmed-hospitals/5151600002/</a> |
| South Dakota (None)                                                                                                                                                                                                                                                               |                                                                                                                                                          |                              | 2006 Pandemic Influenza Plan encourages hospitals to create their own triage guidelines<br><a href="https://doh.sd.gov/documents/diseases/flu/PanFluPlan06.pdf">https://doh.sd.gov/documents/diseases/flu/PanFluPlan06.pdf</a>                                                                                                                                                                                                                                                                                                                                                                                                                                                                                                                          |
| Tennessee (2020)<br><a href="https://www.tn.gov/content/dam/tn/health/documents/cedep/ep/Guidance_for_the_Ethical_Allocation_of_Scarce_Resources.pdf">https://www.tn.gov/content/dam/tn/health/documents/cedep/ep/Guidance_for_the_Ethical_Allocation_of_Scarce_Resources.pdf</a> | Goal of saving the most lives; uses SOFA, excluding patients who, based on SOFA and underlying comorbidities, have a high likelihood of mortality during | <b>A-Short-term Survival</b> | Revised 2016 TN Guidelines in consultation with the Office for Civil Rights                                                                                                                                                                                                                                                                                                                                                                                                                                                                                                                                                                                                                                                                             |



|                                                                                                                                                                                                    | admission                                                                                                                                                                                                                                                                                |                                  |                                                                                                                                                                                                                                                                                                                                                                                                                                                                                                                                                                                                                                                                                                                                                                                                                                                      |
|----------------------------------------------------------------------------------------------------------------------------------------------------------------------------------------------------|------------------------------------------------------------------------------------------------------------------------------------------------------------------------------------------------------------------------------------------------------------------------------------------|----------------------------------|------------------------------------------------------------------------------------------------------------------------------------------------------------------------------------------------------------------------------------------------------------------------------------------------------------------------------------------------------------------------------------------------------------------------------------------------------------------------------------------------------------------------------------------------------------------------------------------------------------------------------------------------------------------------------------------------------------------------------------------------------------------------------------------------------------------------------------------------------|
| Texas (None)                                                                                                                                                                                       |                                                                                                                                                                                                                                                                                          |                                  | <p>2020 EOP does not discuss triage<br/> <a href="https://tdem.texas.gov/wp-content/uploads/2019/08/2020-State-of-Texas-Basic-Plan_WEBSITE_05_07_gs.pdf">https://tdem.texas.gov/wp-content/uploads/2019/08/2020-State-of-Texas-Basic-Plan_WEBSITE_05_07_gs.pdf</a></p> <p>North Texas Mass Critical Care Triage Guidelines which use mSOFA have had ongoing updates<br/> <a href="https://www.dallas-cms.org/tmaimis/Default.aspx?WebsiteKey=5857f487-9f64-4281-b4b7-67e6a2224be2&amp;hkey=9f1e00e9-17f8-47f1-a874-2c315f147674&amp;=404;https://www.dallas-cms.org:443/FDCMS/Public_Health/Mass_Critical_Care">https://www.dallas-cms.org/tmaimis/Default.aspx?WebsiteKey=5857f487-9f64-4281-b4b7-67e6a2224be2&amp;hkey=9f1e00e9-17f8-47f1-a874-2c315f147674&amp;=404;https://www.dallas-cms.org:443/FDCMS/Public_Health/Mass_Critical_Care</a></p> |
| Utah (2020)<br><a href="https://georgetown.brookings.edu/wp-content/uploads/2020/04/Utah-2020-Protocol.pdf">https://georgetown.brookings.edu/wp-content/uploads/2020/04/Utah-2020-Protocol.pdf</a> | Narrow exclusion criteria (SOFA>11, severe neurologic impairment, etc.), then shared decision-making whenever possible; consider withdrawal of care based on SOFA except give priority to certain groups: pregnant, healthcare worker, younger age (based on typically better prognosis) | <b>B-1-5 Expected Life-years</b> |                                                                                                                                                                                                                                                                                                                                                                                                                                                                                                                                                                                                                                                                                                                                                                                                                                                      |



|                                                                                                                                                                                                                                                                                                                                 |                                                                                                                                                                                                                                                                                                                                                                                 |                                         |                                                                                                                                                                                                                                                            |
|---------------------------------------------------------------------------------------------------------------------------------------------------------------------------------------------------------------------------------------------------------------------------------------------------------------------------------|---------------------------------------------------------------------------------------------------------------------------------------------------------------------------------------------------------------------------------------------------------------------------------------------------------------------------------------------------------------------------------|-----------------------------------------|------------------------------------------------------------------------------------------------------------------------------------------------------------------------------------------------------------------------------------------------------------|
| <p>Vermont (2020)<br/> <a href="https://www.healthvermont.gov/sites/default/files/documents/pdf/Vermont%20CSC%20Plan%2005.18.2020.pdf">https://www.healthvermont.gov/sites/default/files/documents/pdf/Vermont%20CSC%20Plan%2005.18.2020.pdf</a></p>                                                                            | <p>Excludes: serious illness/organ failure with "poor prognosis," then triages based on SOFA. Can consider chronic conditions/resource limitations/other health scores for tie-breakers</p>                                                                                                                                                                                     | <p><b>B-1-5 Expected Life-years</b></p> | <p>Influenced by NY and MN guidelines</p>                                                                                                                                                                                                                  |
| <p>Virginia (2009)<br/> <a href="https://www.vdh.virginia.gov/content/uploads/sites/10/2019/01/VA-Critical-Resource-Shortages-Planning-Guide.pdf">https://www.vdh.virginia.gov/content/uploads/sites/10/2019/01/VA-Critical-Resource-Shortages-Planning-Guide.pdf</a></p>                                                       | <p>General planning guide</p>                                                                                                                                                                                                                                                                                                                                                   | <p><b>O-Other</b></p>                   |                                                                                                                                                                                                                                                            |
| <p>Washington (2020)<br/> <a href="https://nwhrn.org/wp-content/uploads/2020/03/Scarce_Resource_Management_and_Crisis_Standards_of_Care_Overview_and_Materials-2020-3-16.pdf">https://nwhrn.org/wp-content/uploads/2020/03/Scarce_Resource_Management_and_Crisis_Standards_of_Care_Overview_and_Materials-2020-3-16.pdf</a></p> | <p>Excludes patients with severe underlying disease predicting poor short-term survival, or those with lower "baseline functional status." For those who qualify, triage is based on expected duration of critical care, prognosis based on acute illness and underlying conditions that limit short-term survival, response to treatment, SOFA, baseline functional status</p> | <p><b>C-Total Life-years</b></p>        |                                                                                                                                                                                                                                                            |
| <p>West Virginia (None)</p>                                                                                                                                                                                                                                                                                                     |                                                                                                                                                                                                                                                                                                                                                                                 |                                         | <p>WV Hospital Association is working on their own guidelines but not seeking state approval; EOP from 2016 does not contain specific triage guidance<br/> <a href="https://emd.wv.gov/Preparedness/Resour">https://emd.wv.gov/Preparedness/Resour</a></p> |



|                                                                                                                                                                                                            |                  |                |                                                                                                                                                                                                                                                                                                                                                                                                                                                  |
|------------------------------------------------------------------------------------------------------------------------------------------------------------------------------------------------------------|------------------|----------------|--------------------------------------------------------------------------------------------------------------------------------------------------------------------------------------------------------------------------------------------------------------------------------------------------------------------------------------------------------------------------------------------------------------------------------------------------|
|                                                                                                                                                                                                            |                  |                | <a href="https://www.wv.gov/ces/Documents/WV%20EOP%202016/ESF%2008%20-%20Public%20Health%20FINAL%201-6-16.pdf">ces/Documents/WV%20EOP%202016/ESF%2008%20-%20Public%20Health%20FINAL%201-6-16.pdf</a>                                                                                                                                                                                                                                             |
| Wisconsin (None)                                                                                                                                                                                           |                  |                | In 2020 a draft was being crafted, but progress was halted <a href="https://www.wpr.org/sites/default/files/foistletter.pdf">https://www.wpr.org/sites/default/files/foistletter.pdf</a><br>The state hospital association apparently has developed a plan this year <a href="https://talkingpointsmemo.com/news/how-your-covid-flooded-hospital-will-triage">https://talkingpointsmemo.com/news/how-your-covid-flooded-hospital-will-triage</a> |
| Wyoming (2020) <a href="https://health.wyo.gov/wp-content/uploads/2020/05/SHOInstructionsCOVID19_May122020.pdf">https://health.wyo.gov/wp-content/uploads/2020/05/SHOInstructionsCOVID19_May122020.pdf</a> | General guidance | <b>O-Other</b> | Leaves things up to hospitals; states that providers should act reasonably, in good faith                                                                                                                                                                                                                                                                                                                                                        |
| Washington, D.C. (None)                                                                                                                                                                                    |                  |                | D.C. DOH cites Institute of Medicine CSC guide <a href="http://dclaw.dohcloudservices.com/table-of-contents/scope-practice-volunteer-health-practitioners-and-crisis-standards-care">http://dclaw.dohcloudservices.com/table-of-contents/scope-practice-volunteer-health-practitioners-and-crisis-standards-care</a>                                                                                                                             |

212150
